# Supplementary material for: The Bright and Dark Sides of Herbal Infusions: Assessment of Antioxidant Capacity and Determination of Tropane Alkaloids
Source: MDPI journal article supplement (doi:10.3390/toxins15040245), 2023-03-27
Supplement: s1 [file s1]

# Supplementary Materials: The Bright and Dark Sides of Herbal Infusions: Assessment of Antioxidant Capacity and Determination of Tropane Alkaloids

Ana Rita Soares Mateus, Carmen Crisafulli, Matilde Vilhena, Sílvia Cruz Barros, Angelina Pena and Ana Sanches Silva

**Table S1.** Information about samples of dried plants for infusion and their characteristics.

| Sample | Common name                      | Scientific name                       | Origin   | Biological agriculture | Expiration date |
|--------|----------------------------------|---------------------------------------|----------|------------------------|-----------------|
| A      | Peppermint                       | <i>Mentha x piperita</i> L.           | EU       | No                     | feb/25          |
| B      | Milk thistle                     | <i>Silybum marianum</i> L.            | Portugal | No                     | march/25        |
| C      | Lemon balm                       | <i>Melissa officinalis</i> L.         | EU       | No                     | march/25        |
| D      | Chamomile                        | <i>Matricaria Chamomilla</i> L.       | Croatia  | No                     | jan/25          |
| E      | Narrow-leaved purple cone-flower | <i>Echinacea angustifolia</i> DC.     | EU       | Yes                    | jan/24          |
| F      | Stinging nettle                  | <i>Urtica dioica</i> L.               | EU       | Yes                    | jan/24          |
| G      | Peppermint                       | <i>Mentha × piperita</i> L.           | Austria  | Yes                    | april/25        |
| H      | Indian Senna                     | <i>Cassia angustifolia</i> L.         | India    | No                     | march/25        |
| I      | Tea plant                        | <i>Camellia sinensis</i> L.           | Not EU   | No                     | april/25        |
| J      | Lemon Balm                       | <i>Melissa officinalis</i> L.         | EU       | Yes                    | nov/22          |
| K      | Yerba mate                       | <i>Ilex paraguariensis</i> A. St. Hil | EU       | Yes                    | nov/22          |
| L      | Greek Lemon Verbena              | <i>Aloysia citrodora</i> P.           | EU       | Yes                    | nov/22          |
| M      | Ginger                           | <i>Zingiber officinale</i> R.         | EU       | Yes                    | nov/22          |
| N      | Peppermint                       | <i>Mentha x piperita</i> L.           | EU       | Yes                    | nov/22          |
| O      | Fennel                           | <i>Foeniculum vulgare</i> Mill.       | EU       | Yes                    | nov/22          |
| P      | Thyme                            | <i>Thymus vulgaris</i> L.             | EU       | Yes                    | nov/22          |
| Q      | Anise                            | <i>Pimpinella anisum</i> L.           | EU       | Yes                    | nov/22          |
